# Supplementary material for: Effects of Contaminated Soil on the Survival and Growth Performance of European (Populus tremula L.) and Hybrid Aspen (Populus tremula L. × Populus tremuloides Michx.) Clones Based on Stand Density
Source: Plants (Basel). 2022 Jul 28;11(15):1970. doi: 10.3390/plants11151970 (PMC9370595; doi:10.3390/plants11151970)
Supplement: Supplementary file 1 [file plants-11-01970-s001.zip › plants-1665276-supplementary.pdf]

Supplementary Material (SM)

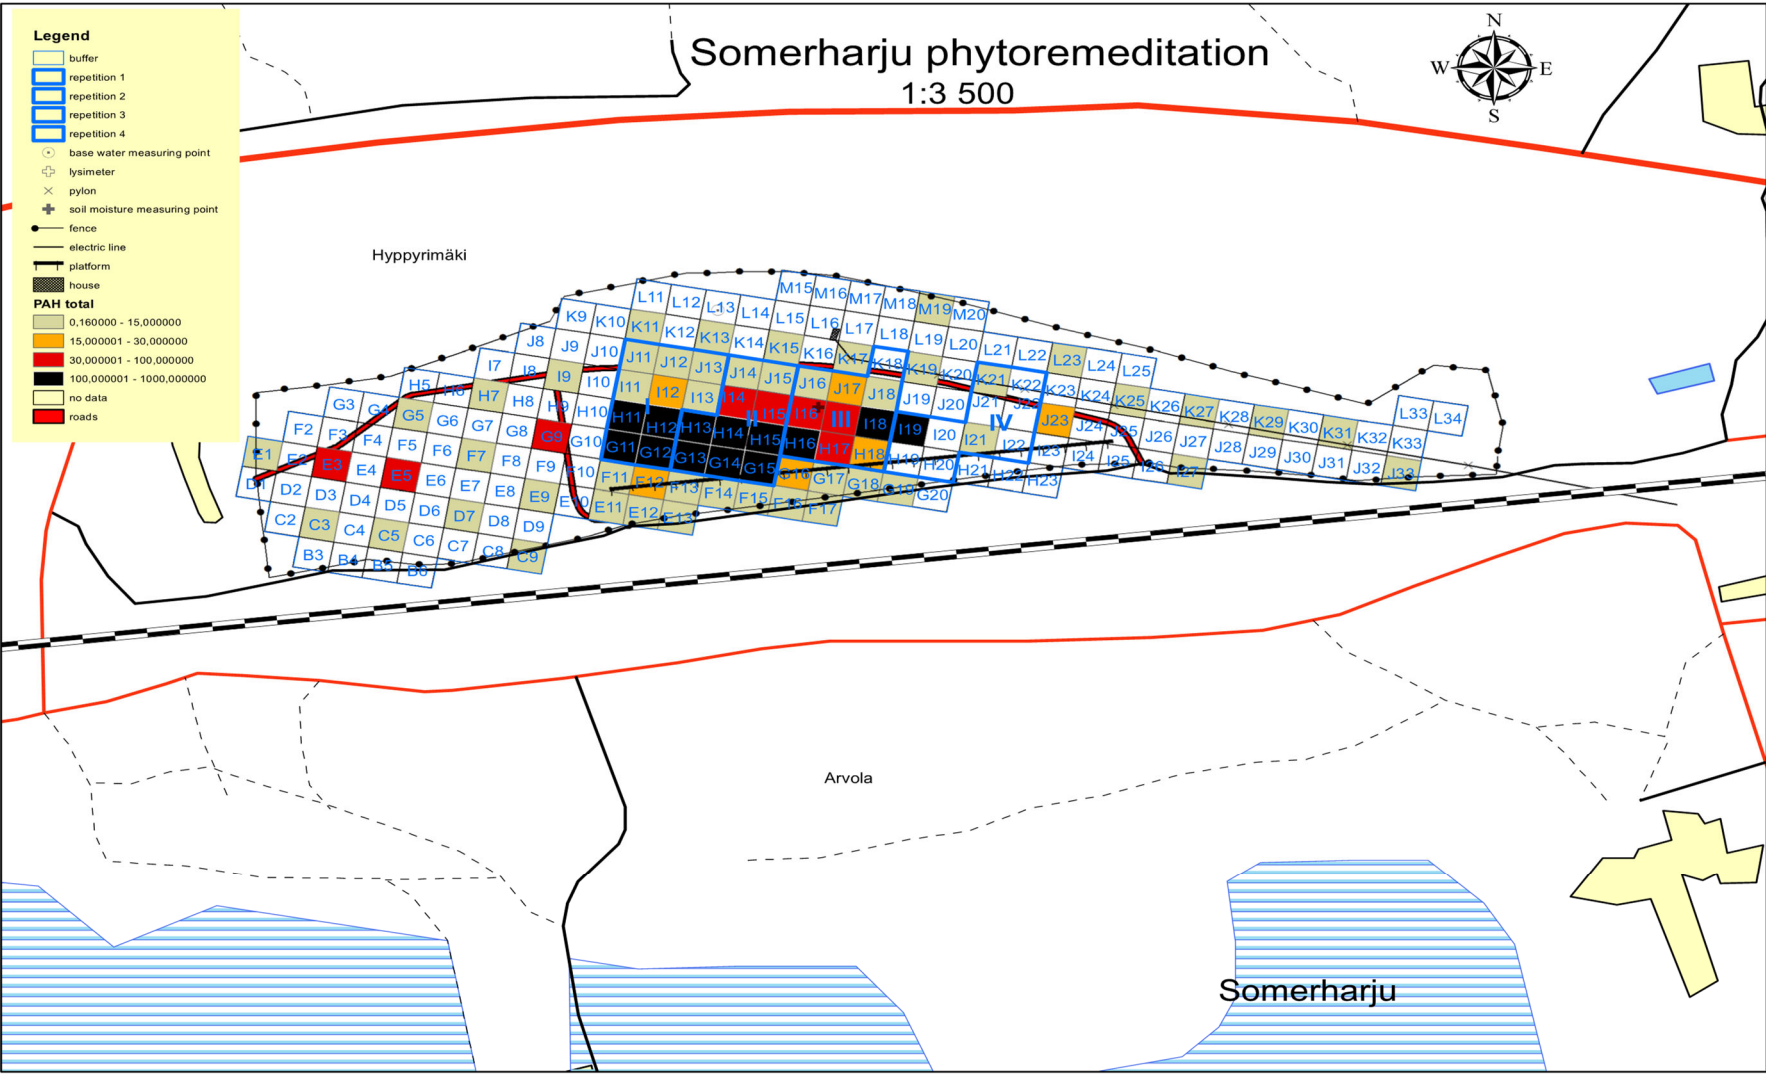

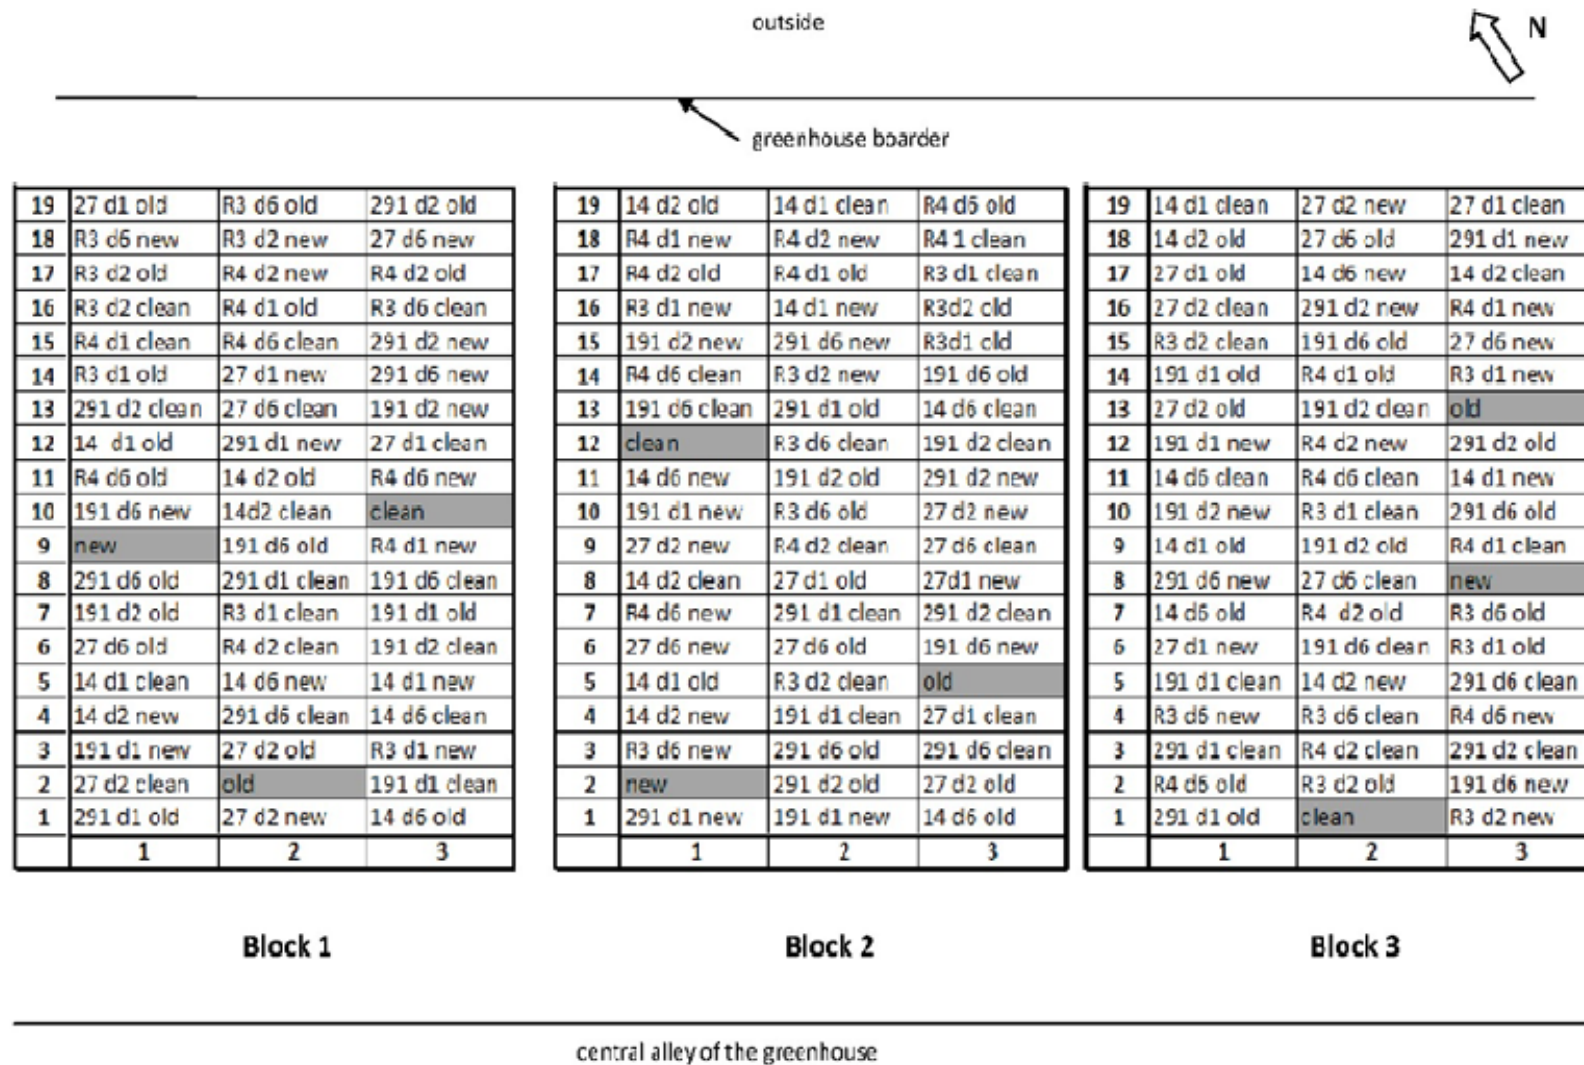

**Figure S2.** The layout of the experimental design for the greenhouse. Clean: pristine soil without contamination; new: pristine soil spiked with fresh diesel oil; old: creosote soil polluted with hydrocarbons; d: density (d1-low density, d2- medium density, d6-high density). Adapted from [7].

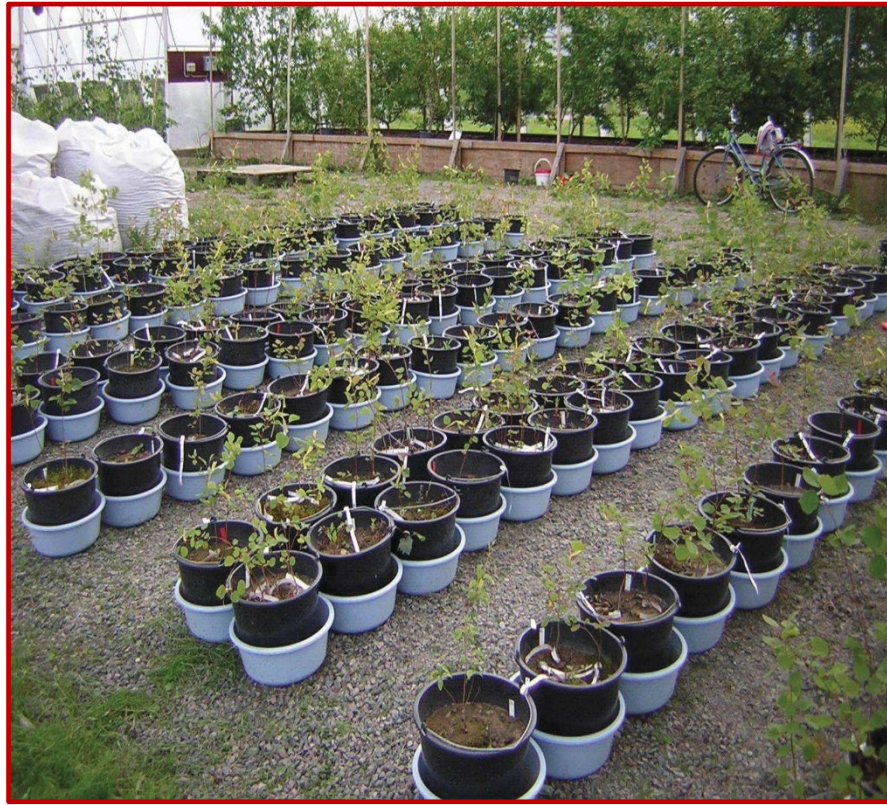

**Figure S3.** Plant's growth condition in the summer of 2015 at an open greenhouse, Haapastensyrjä tree-breeding center in Southern Finland (N: 60° 36', E: 24° 25'). Adapted from [7].
